# Supplementary material for: Multicompartment emulsion droplets for programmed release of hydrophobic cargoes
Source: Royal Society of Chemistry journal article supplement (doi:10.1039/c9fo00558g), 2019-01-01
Supplement: c9fo00558g1.pdf [file c9fo00558g1.pdf]

## Electronic Supporting Information (ESI)

### Multicompartment Emulsion Microdroplets for Programmed Release of Hydrophobic Cargoes

Xiao-Wei Chen,<sup>†‡</sup> Xue-Ying Ning,<sup>‡</sup> Yuan Zou,<sup>†§</sup> Xiao Liu,<sup>†</sup> and Xiao-Quan Yang<sup>\*†</sup>

<sup>†</sup> Guangdong Province Key Laboratory for Green Processing of Natural Products and Product Safety, Department of Food Science and Engineering, South China University of Technology, Guangzhou 510640, P. R China

<sup>‡</sup> Lipid Technology and Engineering, School of Food Science and Engineering, Henan University of Technology, Lianhua Road 100, Zhengzhou 450001, P. R China

<sup>§</sup> Department of Bioengineering, College of Food Science, South China Agricultural University, Guangzhou, 510642, PR China

**Corresponding to:** Xiao-Quan Yang

Tel: +86 20 87114262; Fax: +86 20 87114263

E-mail address: [fexqyang@scut.edu.cn](mailto:fexqyang@scut.edu.cn), [fexqyang@163.com](mailto:fexqyang@163.com)

## 19 Environmental stress stability

20 The nanodroplet-stabilized multicompartment core/shell microdroplets were subjected to a range  
 21 of environmental stresses for monitoring their physical stability. **pH stability.** Newly prepared  
 22 microdroplets dispersions were placed into a series of different glass tubes, and then their pH values  
 23 were adjusted to obtain values ranging from 2 to 9 by addition of 1 M HCl or 1 M NaOH. **Ionic**  
 24 **strength stability.** Newly prepared microdroplets dispersions (pH 7) were transferred to glass tubes,  
 25 then varying levels of NaCl solution were added with salt levels ranging from 0 to 500 mM NaCl.  
 26 **Thermal processing stability.** Newly prepared microdroplets dispersions (pH 7, 0 mM NaCl) were  
 27 distributed amongst a series of sealed glass tubes that were placed into water baths set at different  
 28 temperatures (25-100 °C) for 30 min. **Agitation stability.** Newly prepared microdroplets dispersions  
 29 (pH 7, 0 mM NaCl) were subjected to a series of stirring rate (0-600 rpm) with magnetic rotor for 30  
 30 min, and transferred to glass tubes for storage and analysis.

31

32 **Table S1.** Physicochemical characteristic of studied aroma compounds.

| Fragrance compounds                | 2,3-Butanedione                                                                     | cis-3-Hexen-1-ol                                                                    | Ethyl butyrate                                                                       | d-Limonene                                                                            |
|------------------------------------|-------------------------------------------------------------------------------------|-------------------------------------------------------------------------------------|--------------------------------------------------------------------------------------|---------------------------------------------------------------------------------------|
| Chemical formula                   | C <sub>4</sub> H <sub>6</sub> O <sub>2</sub>                                        | C <sub>8</sub> H <sub>12</sub> O                                                    | C <sub>6</sub> H <sub>12</sub> O <sub>2</sub>                                        | C <sub>10</sub> H <sub>16</sub>                                                       |
| Structural formula                 |  |  |  |  |
| Boiling point (°C)                 | 87                                                                                  | 156.5                                                                               | 120                                                                                  | 176                                                                                   |
| LogP                               | -1.80                                                                               | 1.34                                                                                | 1.85                                                                                 | 4.57                                                                                  |
| Vapour pressure (Pa) at 25 °C      | 7572.71                                                                             | 317                                                                                 | 1510                                                                                 | 199.98                                                                                |
| Solubility in water (g/L) at 25 °C | 200                                                                                 | 14.7                                                                                | 4.90                                                                                 | 13.80                                                                                 |
| Odour descriptor                   | Butter, Fat                                                                         | Fresh-green                                                                         | Ethereal-fruity                                                                      | Citrus-like                                                                           |

33 <sup>a</sup> P-Partition coefficient between octanol and water.

34 <sup>b</sup> Water solubility at 25 °C.

**Table S2.** Environmental stress (pH, ionic strength, temperature and external force) on the mean microdroplets diameter.<sup>a</sup>

| pH                               | pH 2.0      | pH 4.0      | pH 7.0      | pH 9.0      |
|----------------------------------|-------------|-------------|-------------|-------------|
| D <sub>4,3</sub>                 | 13.94±0.06a | 13.97±0.30a | 13.99±0.07a | 14.14±0.12a |
| ionic concentration <sup>b</sup> | 0 mmol      | 100 mmol    | 300 mmol    | 500 mmol    |
| D <sub>4,3</sub>                 | 13.95±0.06a | 14.04±1.00a | 14.04±0.40a | 14.23±0.39a |
| Temperture <sup>c</sup>          | 25 °C       | 50 °C       | 80 °C       | 100 °C      |
| D <sub>4,3</sub>                 | 13.95±0.06a | 14.23±0.12a | 14.18±0.61a | 14.40±0.15a |
| Agitation <sup>d</sup>           | 0 rpm       | 100 rpm     | 300 rpm     | 600 rpm     |
| D <sub>4,3</sub>                 | 13.95±0.06a | 13.83±1.01a | 14.05±0.10a | 13.94±1.04a |

<sup>a</sup> Data are the means of duplicate measurements and their standards deviations; <sup>b</sup> ionic is NaCl; <sup>c</sup> heat shock in water baths for 30 min; <sup>d</sup> Agitation was operating by magnetic stirring for 30 min. Different letters in same row indicates there is significant difference between the values ( $p < 0.05$ ).

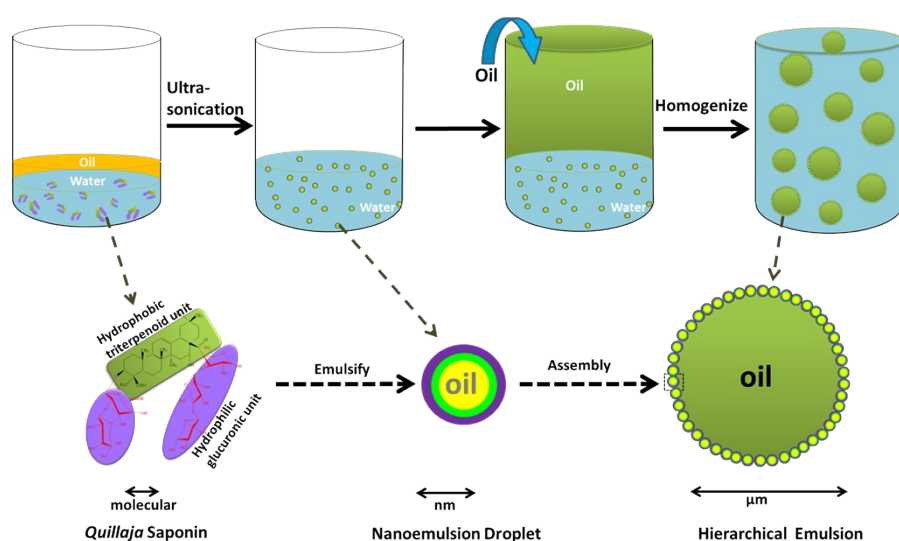

**Figure S1.** Schematic illustration of the fabrication route for multicompartment core/shell microdroplets over two-step processes by a bottom-up approach: Emulsification of *quillaja* saponin (QS), a natural small molecule biosurfactant from the soapbark tree (*Quillaja Saponaria* Molina), gave rise to the formation of nano-scale droplets. Then, the saponin-coated nanodroplets as emulsifying agents were stable the oil-water interfaces and lead to the formation of microdroplets with hierarchically multicompartment core/shell structure.

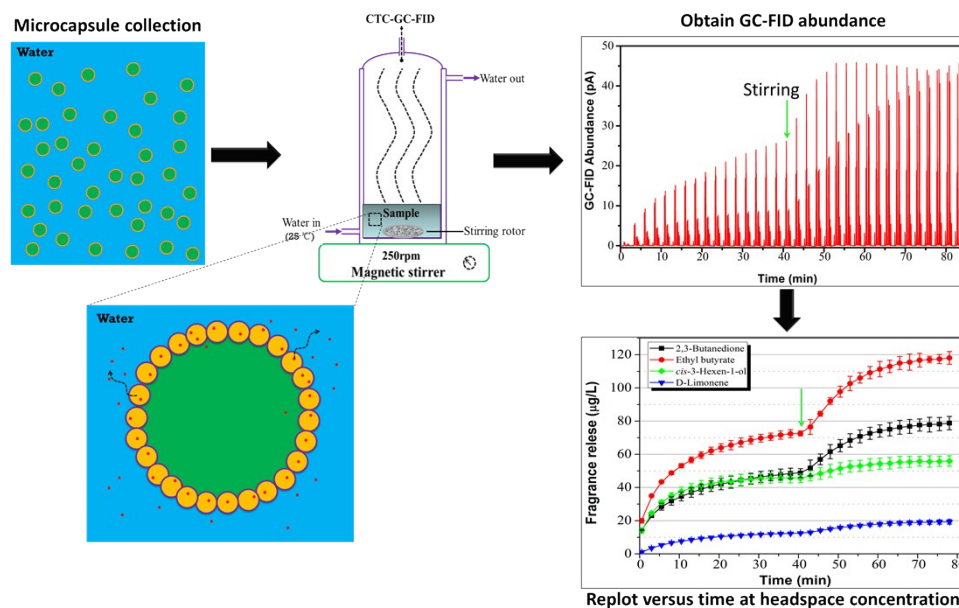

48

49 **Figure S2.** Schematics showing the detailed CTC-GC-FID procedures to acquire the fragrance  
 50 release profile.

51

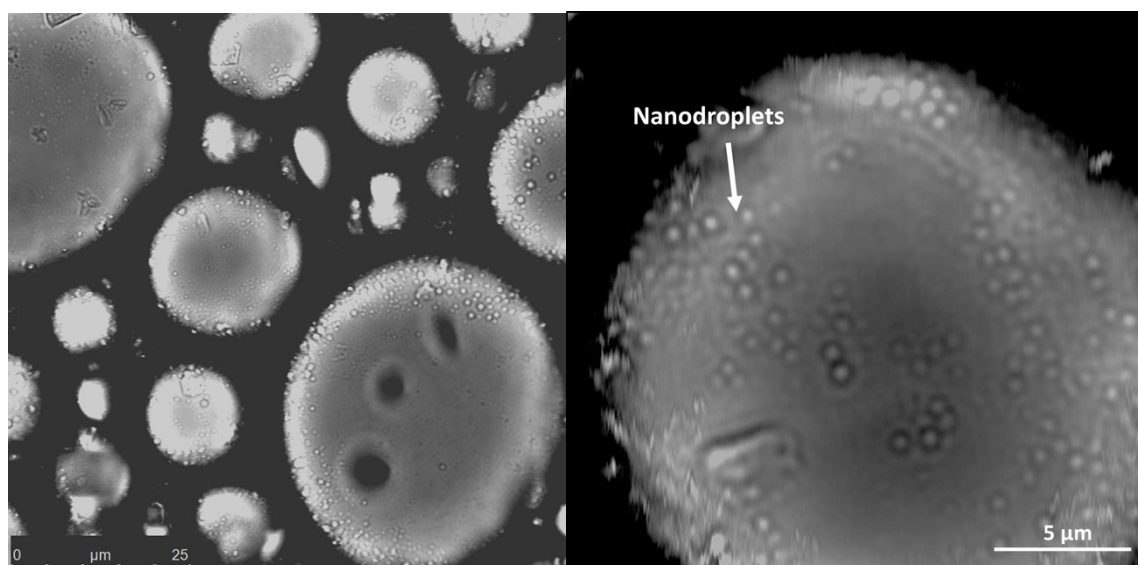

52

53 **Figure S3.** Magnified bright field optical microscopy of microdroplets surface clearly showing the  
 54 nanodroplets arrangement. The arrow clearly indicates that a large amount of nanodroplets are  
 55 situated on the microdroplets surface.

56

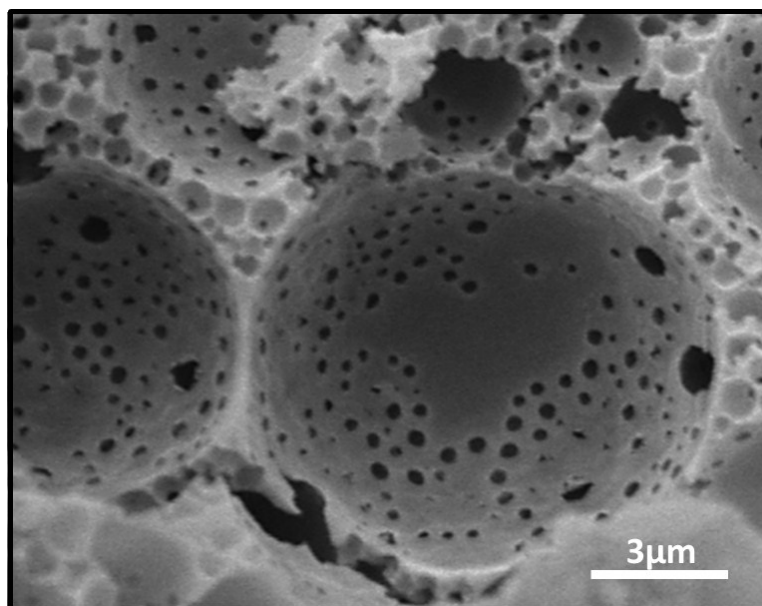

57

58 **Figure S4.** FE-SEM micrographs of microdroplets stabilized by nanodroplets, where the oil phase  
 59 was replaced by cyclohexane and dried at 60 °C overnight.

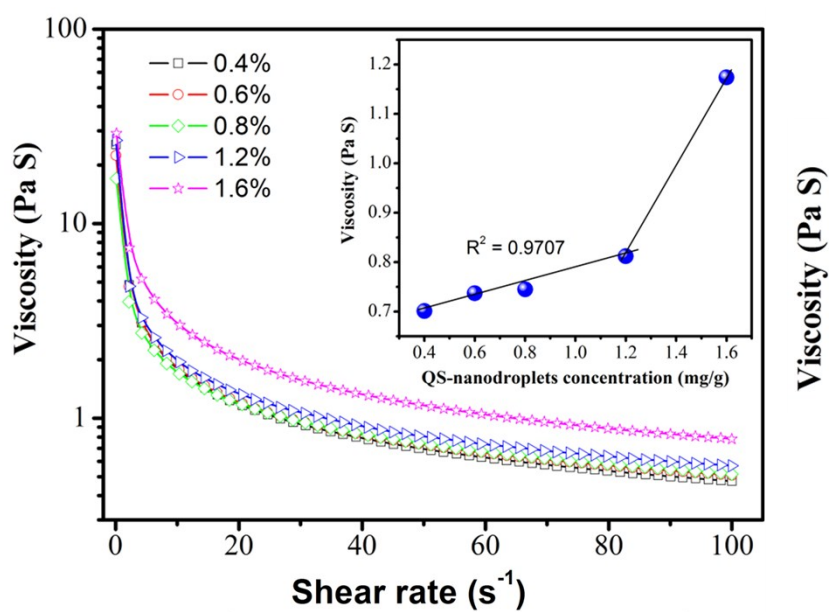

60

61 **Figure S5.** Effect of saponin-coated nanodroplets concentration on the viscosity of emulsion droplets  
 62 at room temperature.
